# Supplementary figures and images for: Crystalline inclusion properties of new pyridine and thiophene modified wheel-and-axle diol hosts
Source: Royal Society of Chemistry journal article supplement (doi:10.1039/c5ce00180c), 2015-01-01

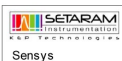

Procedure : 20°C--->220°C(5K min-1)--->20(10Kmin-1)  
Zone name : 1 Standard zone

Atmosphere : 1:Ar, 2:Air, 3:Air, 4:O2  
Mass : 6.8 (mg)  
Crucible : Al 75 µl

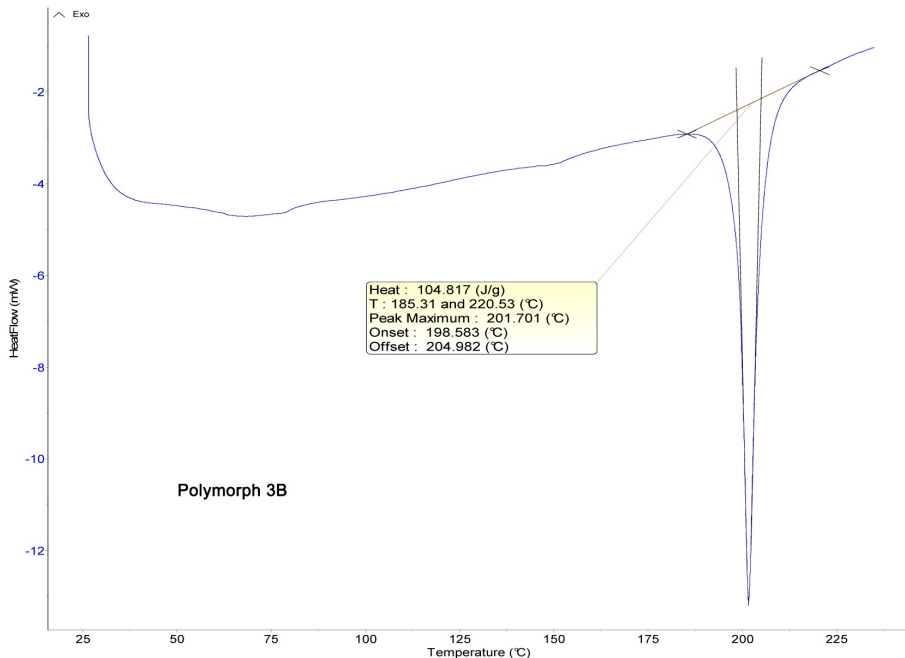

Supplement: c5ce00180c1.pdf [file c5ce00180c1.pdf]
